# Supplementary material for: Rice Domestication Revealed by Reduced Shattering of Archaeological rice from the Lower Yangtze valley
Source: PubMed Central journal article supplement (PMC4914946; doi:10.1038/srep28136), 2016-06-21
Supplement: srep28136-s1.pdf [file srep28136-s1.pdf]

# Rice Domestication Revealed by Reduced Shattering of Archaeological rice from the Lower Yangtze valley

Yunfei Zheng, Gary W. Crawford, Leping Jiang, Xugao Chen

## SUPPLEMENTARY INFORMATION

### SUPPLEMENTARY FIGURES

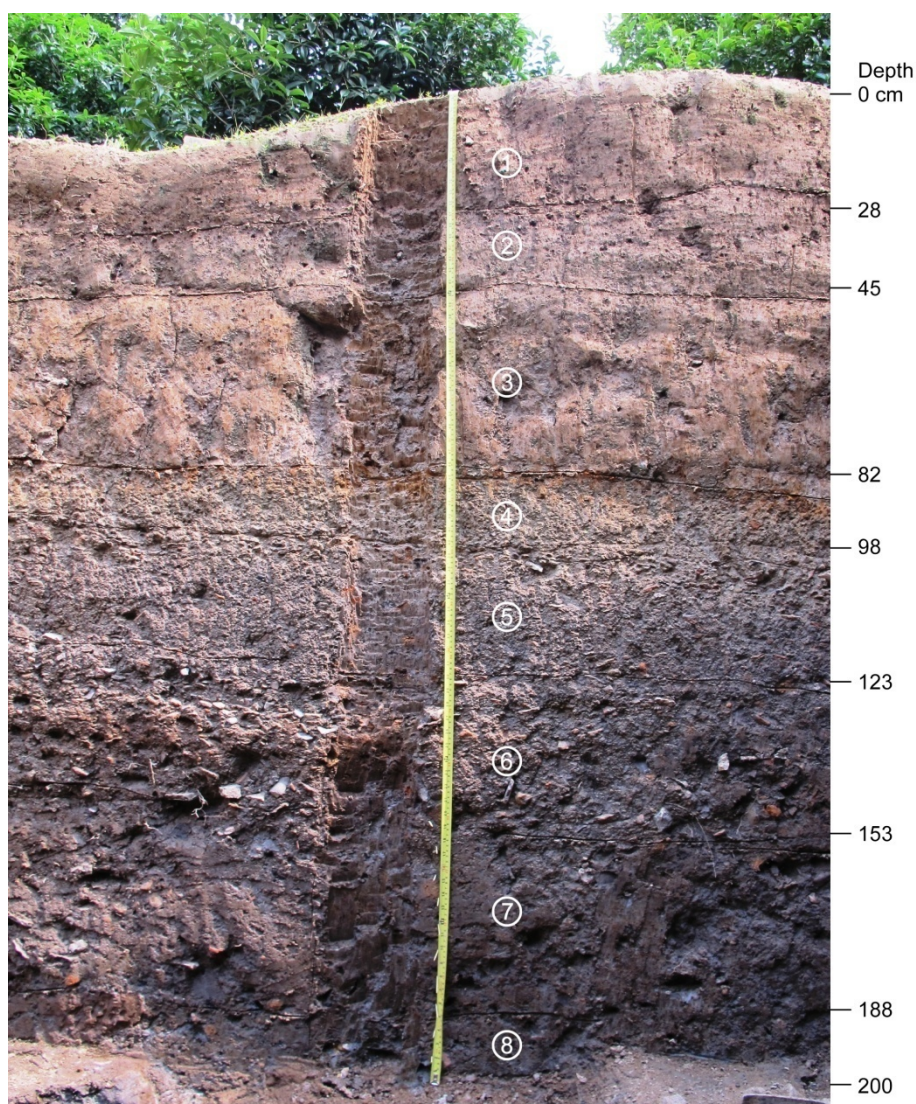

**Supplementary Figure S1: Stratigraphic layers at Huxi.** The southern section below the surface was divided into eight strata based on soil texture, color, and cultural inclusions: stratum 1: yellow, fine sand; stratum 2: yellow, fine sand; stratum 3: yellow, coarse silt, few earthenware fragments; stratum 4: yellow-gray; fine silt, earthenware fragments; stratum 5: yellow-gray; fine silt, numerous earthenware fragments; stratum 6: gray brown clay, a large quantity of earthenware fragments; stratum 7: gray brown clay, a small amount of earthenware fragments; stratum 8, brown clay, a small amount of earthenware fragments. stratum 3 and the following deeper are the Shangshan Culture strata.

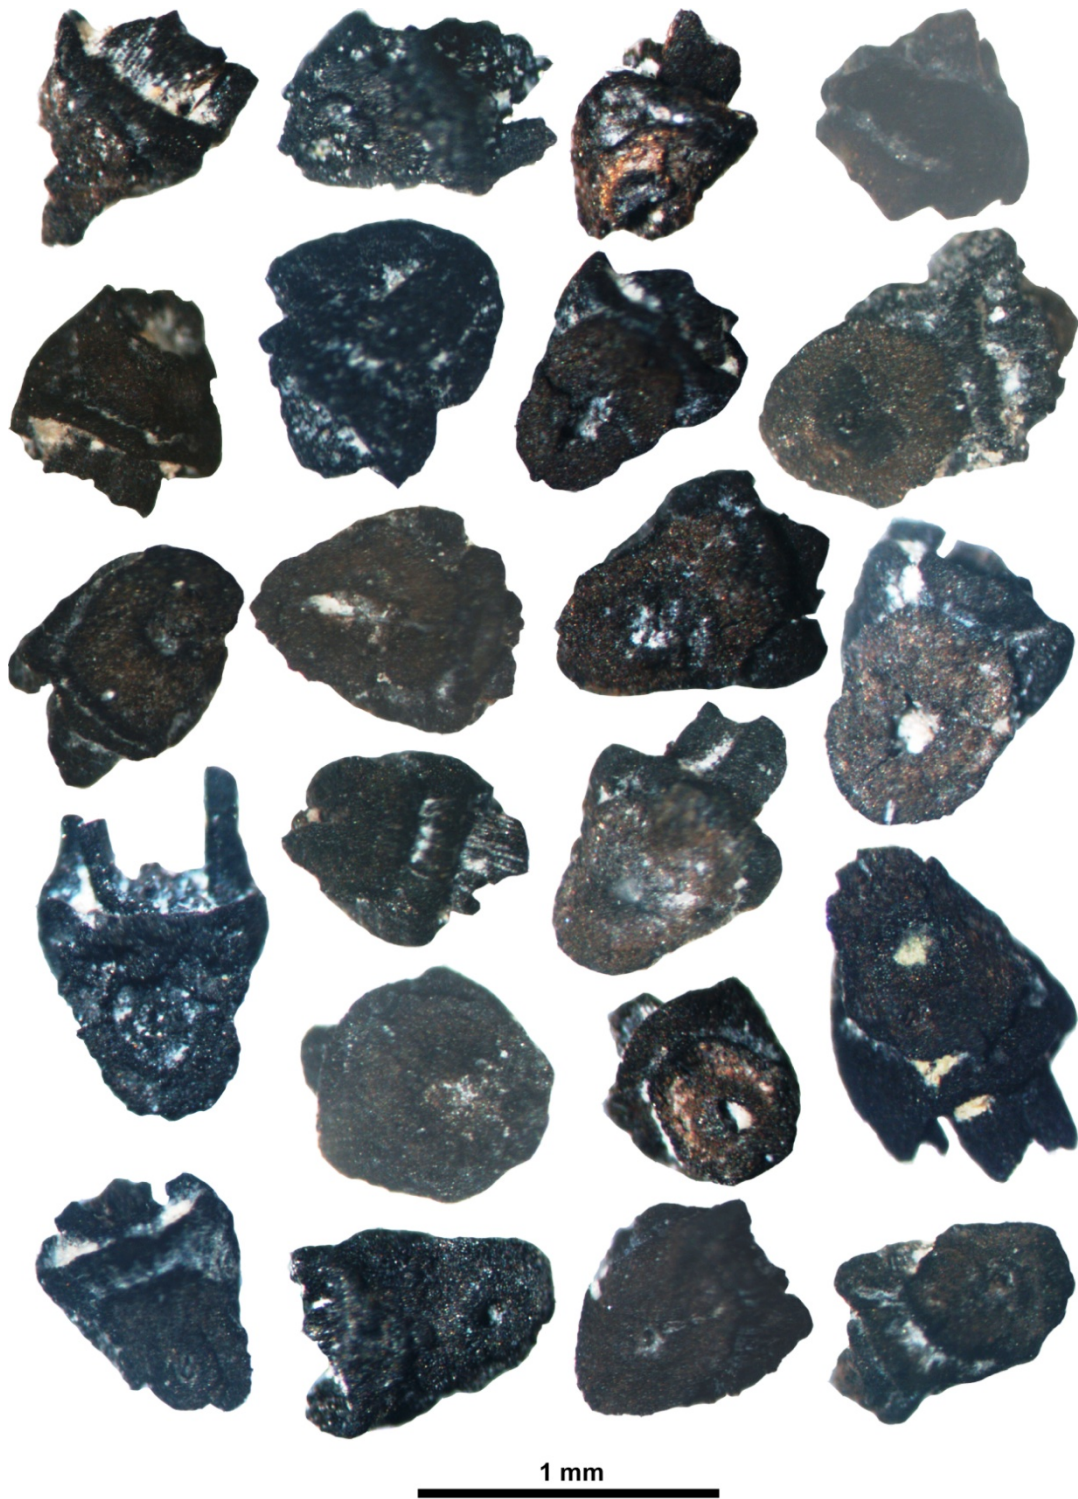

**Supplementary Figure S2: Rice rachillae found in Huxi site.** The spikelet bases from Huxi comprise three types: 1) a wild type with smooth base and intact medullary cavity, 2) an intermediate type with a relatively smooth base and a torn medullary cavity or with some pedicel still present, and 3) a non-shattering type with part of the pedicel retained.

## SUPPLEMENTARY TABLES

**Supplementary Table S1: Chronology and AMS radiocarbon dates for the Huxi site.**

| Strata and pits<br>(Depth, cm, below surface) | Lab Number | Material | <sup>14</sup> C age<br>(BP, 1σ) | Calibrated age<br>(BP, 2σ) |            |
|-----------------------------------------------|------------|----------|---------------------------------|----------------------------|------------|
| Stratigraphic layers                          | 155        | BA30136  | Charcoal                        | 7740 ± 30                  | 8510 ± 80  |
|                                               | 185        | BA30138  | Charcoal                        | 7730 ± 30                  | 8510 ± 80  |
|                                               | 195        | BA30139  | Charcoal                        | 7915 ± 45                  | 8790 ± 190 |
| Pits                                          | J1         | BA30140  | Charcoal                        | 7605 ± 30                  | 8410 ± 40  |
|                                               | H2         | BA30141  | Charcoal                        | 7630 ± 30                  | 8445 ± 75  |

AMS, accelerator mass spectrometry, Peking University AMS Laboratory, calibrated by Oxcal 3.10 and INTCAL 104

**Supplementary Table S2: Phytoliths and their densities in archaeological soil samples by archaeological strata and pits at Huxi site**

| Stratigraphic layers<br>and pits | Phytolith densities grains/g |                   |                   |                     |                     |
|----------------------------------|------------------------------|-------------------|-------------------|---------------------|---------------------|
|                                  | <i>Oryza</i>                 | <i>Phragmites</i> | <i>Miscanthus</i> | <i>Bambusoideae</i> | Bi-peaked tubercles |
| 3                                | 6125                         | 260               | 75344             | 0                   | 807                 |
| 4                                | 56441                        | 241               | 315427            | 0                   | 8365                |
| 5                                | 55469                        | 531               | 189226            | 0                   | 11425               |
| 6                                | 69789                        | 697               | 229654            | 0                   | 20361               |
| 7                                | 26949                        | 331               | 51288             | 310                 | 24728               |
| 8                                | 17384                        | 314               | 18613             | 0                   | 14273               |
| Means                            | 38693                        | 396               | 146592            | 52                  | 13327               |
| J1                               | 20905                        | 0                 | 29615             | 0                   | 11033               |
| H2                               | 85981                        | 0                 | 71651             | 0                   | 80249               |
| H7                               | 58444                        | 0                 | 50651             | 0                   | 30196               |
| H8                               | 72816                        | 0                 | 43689             | 0                   | 52427               |
| Means                            | 59536                        | 0                 | 48902             | 0                   | 43476               |
